# Supplementary material for: Network ‘Small-World-Ness’: A Quantitative Method for Determining Canonical Network Equivalence
Source: PubMed Central journal article supplement (PMC2323569; doi:10.1371/journal.pone.0002051), 2008-04-30
Supplement: pone.0002051.s001.pdf [file pone.0002051.s001.pdf]

## Supporting Information

### Network ‘small-world-ness’: a quantitative method for determining canonical network equivalences

Mark D. Humphries and Kevin Gurney

*Adaptive Behaviour Research Group,  
Department of Psychology, University of Sheffield,  
Sheffield. S10 2TP. UK  
m.d.humphries@sheffield.ac.uk*

## 1 Real-world systems — details

The correlations of  $S^\Delta$  and  $S^{\text{ws}}$  with  $n$  (see main text) are re-plotted in Figure ST1a and Figure ST1b, respectively, using the indices of the networks from Table 1. The three real-world systems with  $S^{\text{ws}} < 1$  were omitted from that correlation as these were not small-world networks. Some systems were borderline small-world networks, defined here as  $1 \leq S^\Delta, S^{\text{ws}} \leq 3$  — 4 systems had  $S^{\text{ws}}$  in this range, 6 systems had  $S^\Delta$  in this range. For these we tested the significance of their small-world-ness scores as detailed in the main text. All had  $S$  values greater than the upper 99% confidence limit. We conclude that all other real-world systems were small-world networks.

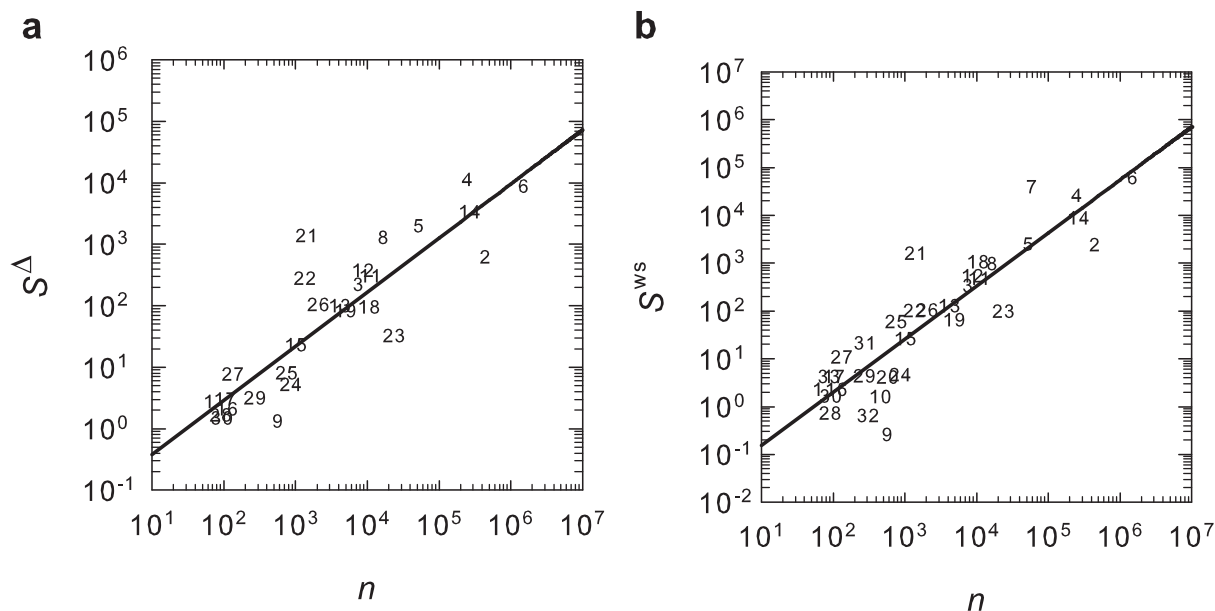

Figure ST1: Correlation of real-world system properties. Both  $S^\Delta$  (a) and  $S^{\text{ws}}$  (b) scale linearly with network size  $n$  across real networks from all domains, and irrespective of other properties. Numbers correspond to entries in Table 1.

The few systems that were not small-world networks were defined as such according to their  $S^{\text{ws}}$  values, and not their  $S^{\Delta}$  values. This illustrates the comment made in the main text that  $C^{\text{ws}}$  and  $C^{\Delta}$  often considerably differ, and actually describe two different graph properties: one interpretation is that  $C^{\text{ws}}$  measures average local edge density and that  $C^{\Delta}$  measures the proportion of closed loops in the network. We can see the difference clearly in Figure ST2, which shows the correlation of  $C^{\text{ws}}$  and  $C^{\Delta}$  for the real-world systems in Table 1 (main text).

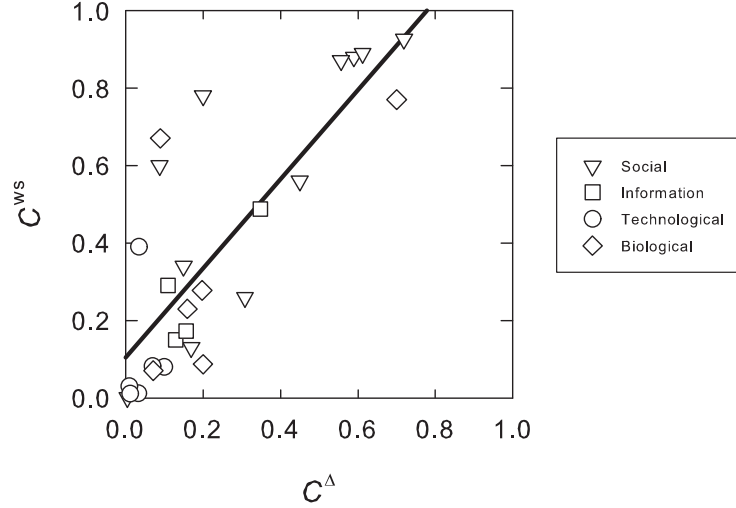

Figure ST2: Correlation of clustering coefficients for real-world systems. Linear regression shows some correlation ( $r^2 = 0.65, n = 27$ ), but  $C^{\text{ws}}$  and  $C^{\Delta}$  for some systems differ by an order of magnitude.

## 2 Finding maximum $S^{\Delta}$

We wanted to find out how close the particular linear model  $S^{\Delta} \simeq 0.023n$  was to the theoretical maximum possible value for  $S^{\Delta}$  from the Watts-Strogatz (WS) model, given the corresponding mean degree  $\langle k \rangle \simeq 5$  for that data-set. To do this, we differentiated  $S_{ws}^{\Delta}$  with respect to  $p$ ; as  $S_{ws}^{\Delta}$  has a unique maximum value, finding the value of  $p$  for which  $dS_{ws}^{\Delta}/dp = 0$  would thus give us the theoretical maximum  $S^{\Delta}$  value.

The ratios  $\lambda_{ws}$  and  $\gamma_{ws}^{\Delta}$  can be expressed as (see main text):

$$\lambda_{ws} = \frac{n \ln(2K) f(nKp)}{K \ln(n)}, \quad (1)$$

$$\gamma_{ws}^{\Delta} = \frac{3K - 3}{8K^2 - 4K} n(1 - p)^3. \quad (2)$$

If we assume that the product  $nKp \gg 1$ , and thus substitute the asymptotic limit  $f(x) = \ln(2x)/4x$

into (1), we get the full expression

$$S_{ws}^{\Delta} = \frac{\gamma_{ws}^{\Delta}}{\lambda_{ws}} = \frac{(3K - 3)n(1 - p)^3 4K^2 \ln(n)p}{(8K^2 - 4K) \ln(2K) \ln(2nKp)}. \quad (3)$$

We want to differentiate this with respect to  $p$ , so gather all constant terms in (3)

$$S_{ws}^{\Delta} = \beta \frac{p(1 - p)^3}{\ln(2nKp)}, \quad (4)$$

where

$$\beta = \frac{4K^2(3K - 3)n \ln(n)}{(8K^2 - 4K) \ln(2K)}, \quad (5)$$

and differentiate (4) to obtain

$$\frac{dS_{ws}^{\Delta}}{dp} = \beta \left\{ \frac{\ln(2nKp) [(1 - p)^3 - 3p(1 - p)^2] - (1 - p)^3}{\ln(2nKp)^2} \right\}, \quad (6)$$

We set  $dS_{ws}^{\Delta}/dp = 0$  and re-arrange to find  $p$ . No closed form solution exists, but after some algebra we find

$$0 = (1 - p) \left( 1 - \frac{1}{\ln(2nKp)} \right) - 3p. \quad (7)$$

We use a standard minimisation routine — `fzero` from MATLAB (The MathWorks, Natick, MA), with an initial value of  $p = 0.5$  — to find values for  $p$  which satisfy this equality, given  $n \in [10^3, 10^4, \dots, 10^{20}]$  and  $K = \langle k \rangle / 2 = 2.5$ . These are shown in Figure ST3a. We see that the value for  $p$  that maximises  $S_{ws}^{\Delta}$  is surprisingly restricted across the whole range of  $n$ , converging on an asymptotic value of  $p = 0.246$  as  $n \rightarrow \infty$ . If we substitute the values for  $n$  and the resulting  $p$  values into (3) we find the linear relationship  $S_{ws}^{\Delta} = 0.181n$ , shown in Figure ST3b. Thus, as shown in the main text (Figure 2a), the linear rate of real-world scaling does not reach the theoretical maximum.

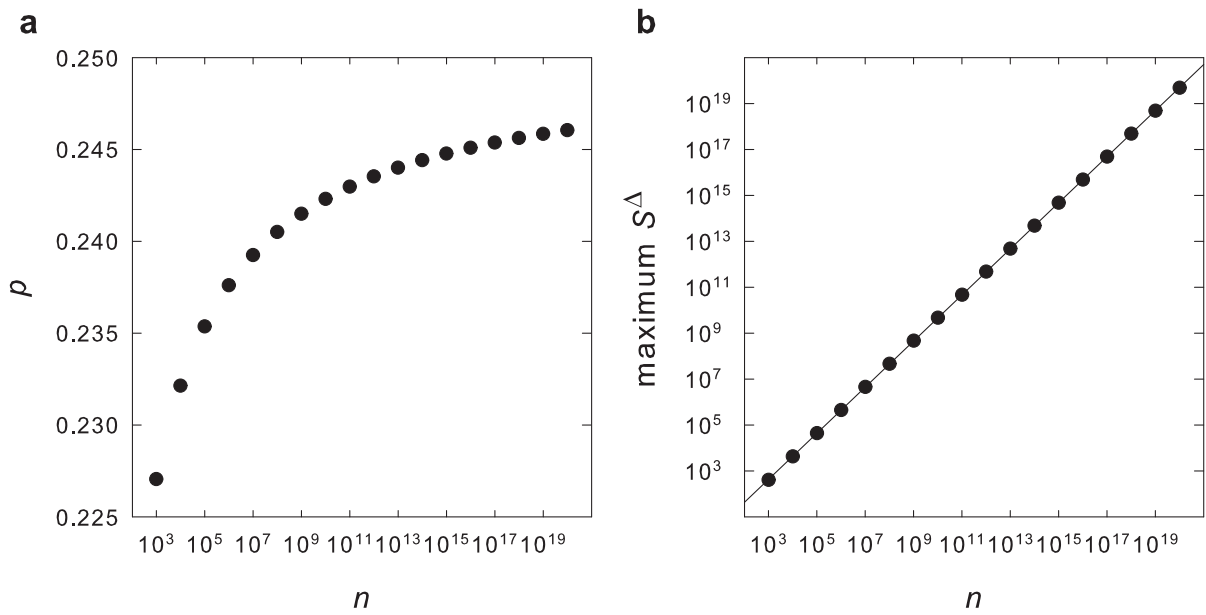

Figure ST3: Determining maximum possible  $S_{ws}^{\Delta}$ . **a** The value for  $p$  that maximises  $S_{ws}^{\Delta}$  in the WS model falls in a narrow range over many orders of magnitude of  $n$ , converging on an asymptotic value of  $p = 0.246$  as  $n \rightarrow \infty$ . **b** The result is that maximum  $S_{ws}^{\Delta}$  grows linearly with  $n$ .
